# Supplementary material for: Cylindracin, a Cys‐rich protein expressed in the fruiting body of Cyclocybe cylindracea, inhibits growth of filamentous fungi but not yeasts or bacteria
Source: PubMed Central journal article supplement (PMC11532979; doi:10.1002/2211-5463.13910), 2024-10-08
Supplement: FEB4-14-1805-s002.pdf [file FEB4-14-1805-s002.pdf]

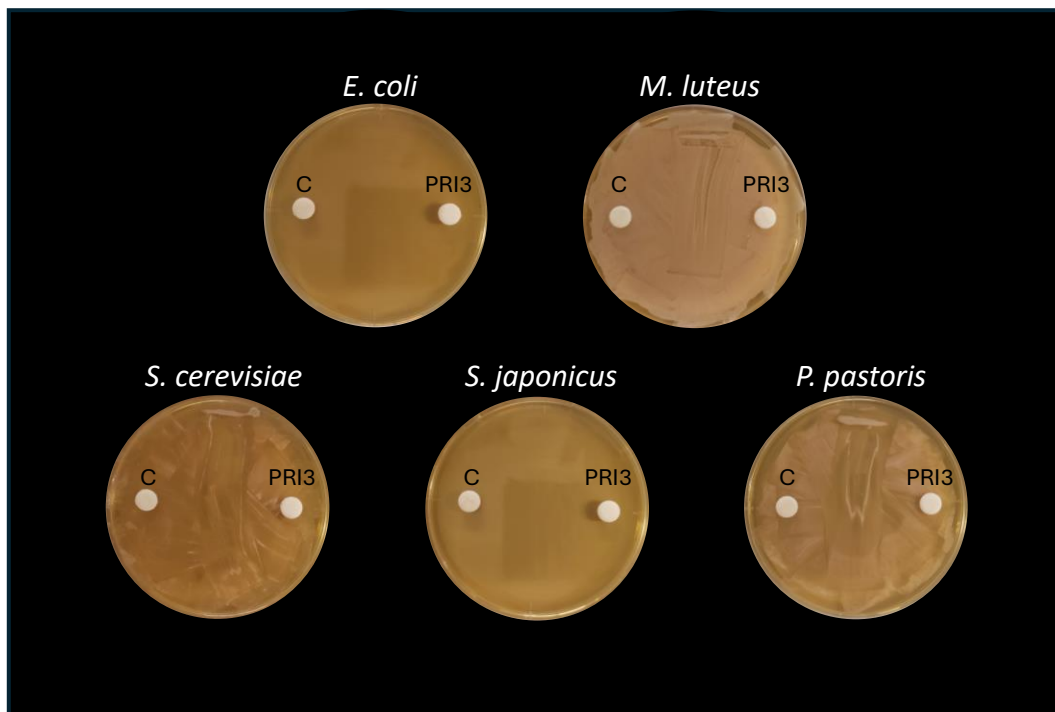

**Figure S4. Antimicrobial assay of recombinant Cc-PRI3(37–95) against bacteria and yeasts on solid medium.** *E. coli* DH5 $\alpha$ , *M. luteus*, *Saccharomyces cerevisiae* sigma 1278b, *Schizosaccharomyces japonicus* NRRL Y-1026E, or *P. pastoris* X-33 was inoculated onto PDA medium containing 3% (w/v) dry bouillon in a 100-mm dish. Paper disks containing 200  $\mu$ g each of recombinant Cc-PRI3(37–95) or buffer only (C: control) were placed on the solid medium. After incubation at 30°C overnight, no halo-zone was observed around the disks ( $n = 1$ ), indicating that recombinant Cc-PRI3(37–95) did not inhibit the growth of the tested bacteria and yeasts.
