# Supplementary material for: Cylindracin, a Cys‐rich protein expressed in the fruiting body of Cyclocybe cylindracea, inhibits growth of filamentous fungi but not yeasts or bacteria
Source: PubMed Central journal article supplement (PMC11532979; doi:10.1002/2211-5463.13910), 2024-10-08
Supplement: FEB4-14-1805-s003.pdf [file FEB4-14-1805-s003.pdf]

\*\*\*

1 GACCGTCAACTGGATATCCCGTCTAATCCATCAAGTAGGGGCCCTTCTTATTCTGCAAATCGCGATGAGGATTTGACCGCCTTTGTAACCTTGACCTGCG 100 (37)

101 TTCTCGCGACCATGGTGGTTGCTCTACCTCCTGGTCCAACGTCGCTGGAGGTCGAGGCGCTAGAAGGCCGCGCTAACGACCCGCAGTGTGTTGTACGGCAA 200 (137)

201 TGTCGCGGGAAAATTTTGCACAATCAGGGCTGCAGAGATGGCGGAGGCTACTGCCAGTACAATGCACAACTAAAAGATGCTCGATGGTGAACATGCGT 300 (237)

\*\*\*

301 GGAAATAGTGCACCCGTCGGCTGTCTCTCATGCACCTGCATAAAGGCGTAGGAATTAGCCACATAGGGTGCGCATAGTCGGTATAGAACTCGGATGTTGG 400 (288)

401 TTTTGTTGCTCGAAGGGGTGTGCGTTTTCGAACTTCAAAAAAAAAAAAAAAAAAAAAA 457

**Figure S1. Nucleotide sequence of *Cc-Pri3* cDNA from *Cyclocybe cylindracea*.**

The translational start and stop codons are indicated (asterisks). Digoxigenin (DIG)-labeled sense and antisense RNA probes for northern blotting and *in situ* hybridization were prepared using the DNA sequence underlined with the solid line. The *Cc-Pri3* (cylindracin: alternatively proposed name in this study) sequence was deposited in the DNA Data Bank of Japan (DDBJ) with accession number LC811956.
