# Supplementary material for: Cylindracin, a Cys‐rich protein expressed in the fruiting body of Cyclocybe cylindracea, inhibits growth of filamentous fungi but not yeasts or bacteria
Source: PubMed Central journal article supplement (PMC11532979; doi:10.1002/2211-5463.13910), 2024-10-08
Supplement: FEB4-14-1805-s005.pdf [file FEB4-14-1805-s005.pdf]

— Control

— 0.4 mg/mL Cc-PRI3(37-95)

**Bacteria***Escherichia coli* DH5 $\alpha$ 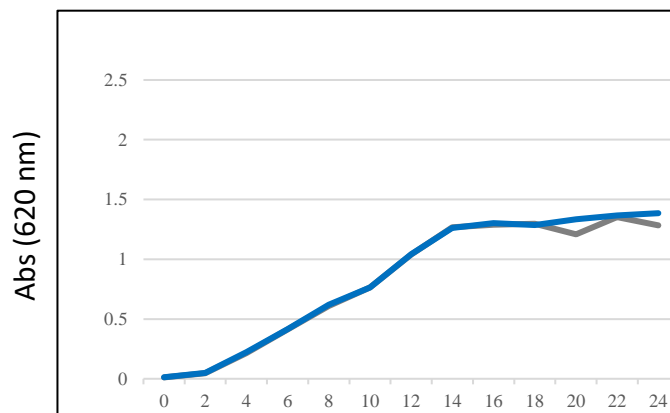*Micrococcus luteus*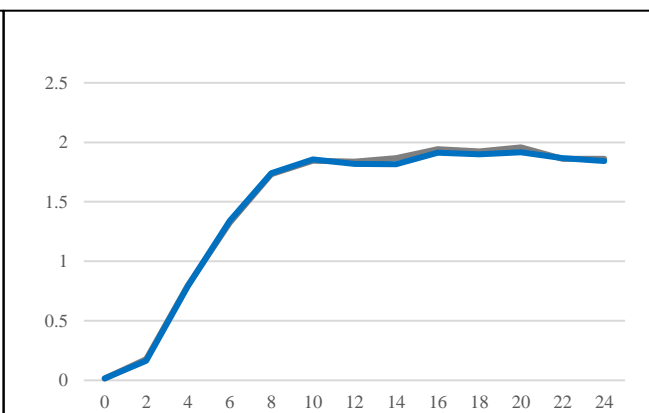

Time (h)

**Yeasts***Saccharomyces cerevisiae*  
sigma 1278b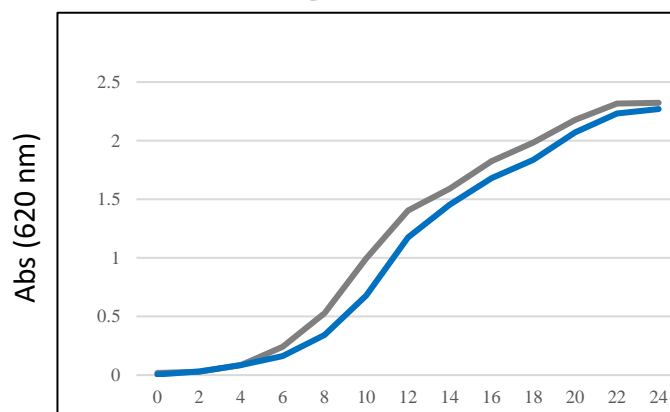*Schizosaccharomyces japonicus*  
NRRL Y-1026E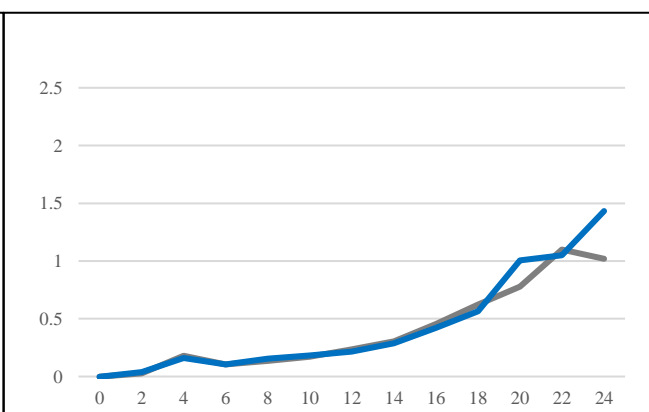

Time (h)

*Pichia pastoris* X-33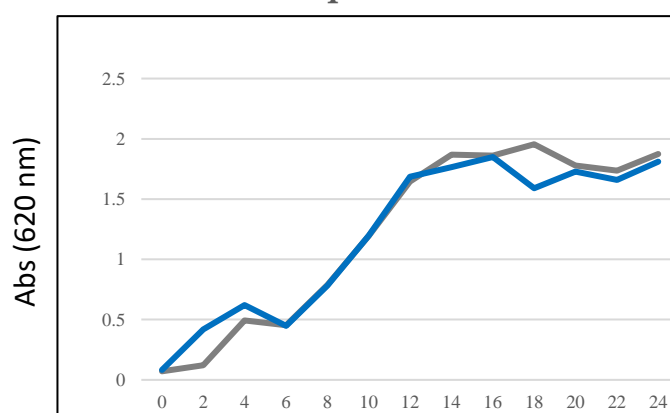*Pichia pastoris* SMD1168H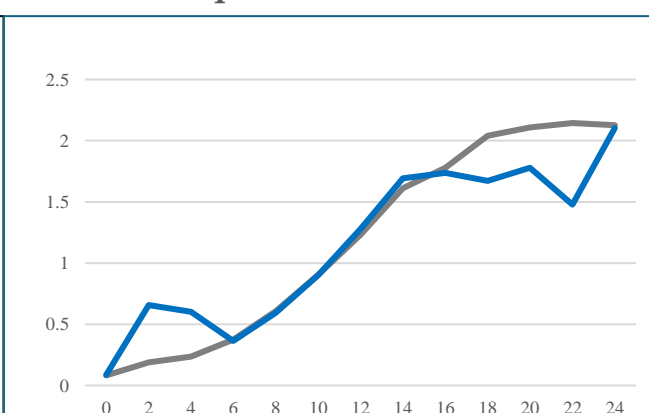

Time (h)

**Figure S3. Antimicrobial assay of recombinant Cc-PRI3(37–95) against bacteria and yeasts in liquid medium.** *E. coli* DH5 $\alpha$  or *M. luteus* was cultivated in 3% (w/v) dry bouillon, with or without recombinant Cc-PRI3(37–95) (0.4 mg/ml), at 30°C for 24 h ( $n = 3$ ). The yeasts *Saccharomyces cerevisiae* sigma 1278b, *Schizosaccharomyces japonicus* NRRL Y-1026E, *P. pastoris* X-33, and *P. pastoris* SMD1168H were cultivated in YPD medium with or without the recombinant protein (0.4 mg/ml) at 30°C for 24 h ( $n = 3$ ). Absorbance at 620 nm was monitored every 2 hours. Each experiment was performed in triplicate, and the mean values of the absorbance were plotted. Recombinant Cc-PRI3(37–95) did not inhibit the growth of the bacteria and yeasts.
